# Supplementary material
Source: PubMed Central journal article supplement (PMC3378854)

Figure S1

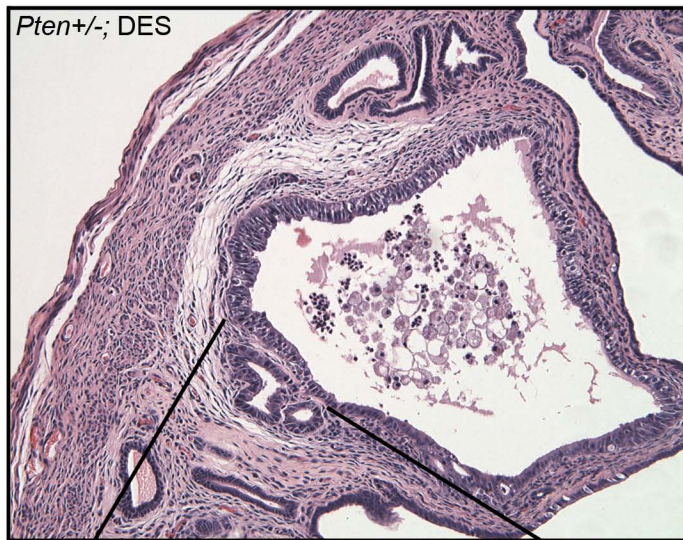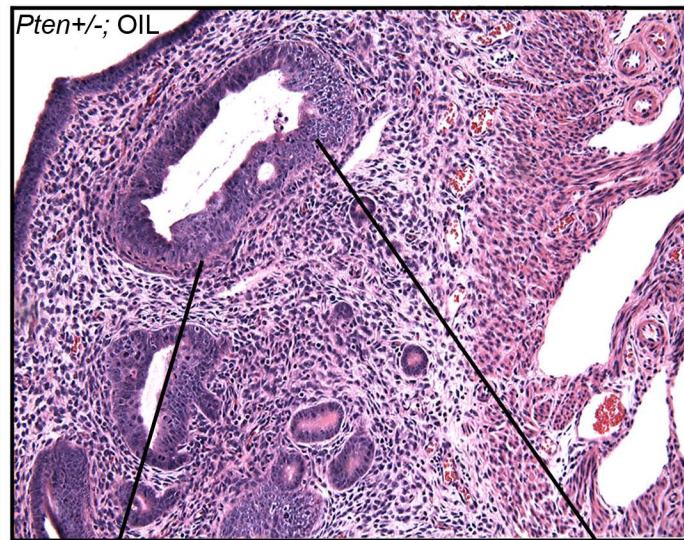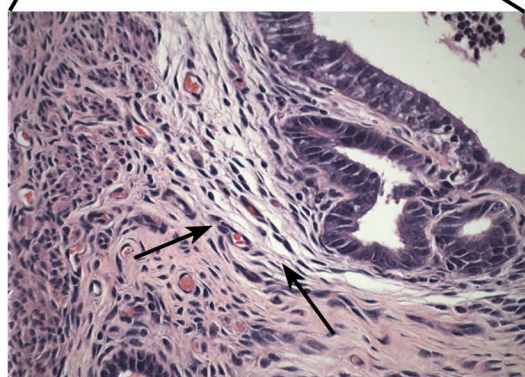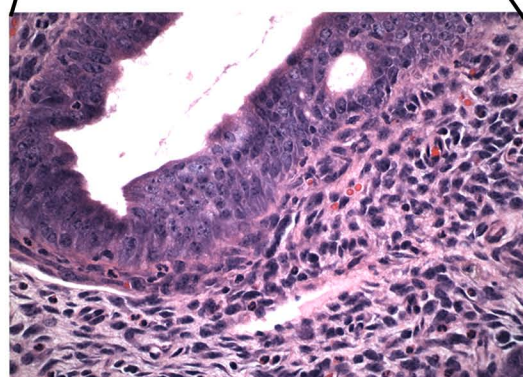

Supplement: mmc1.pdf [file mmc1.pdf]

# Figure S2

A

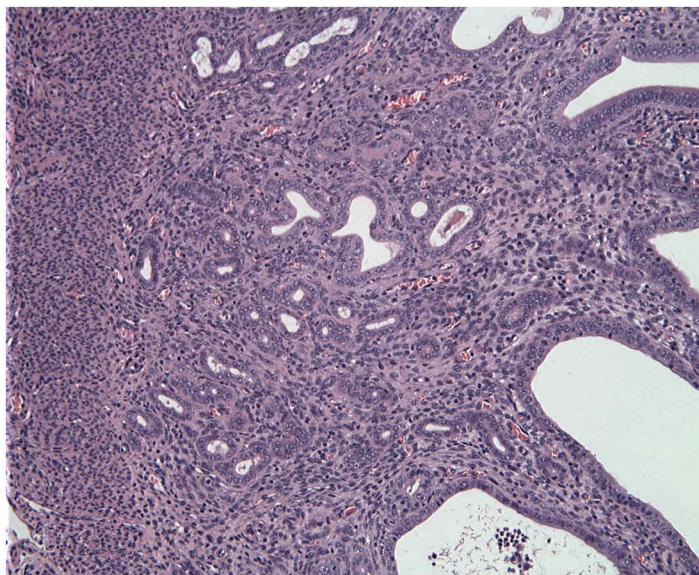

C57BL6 N10

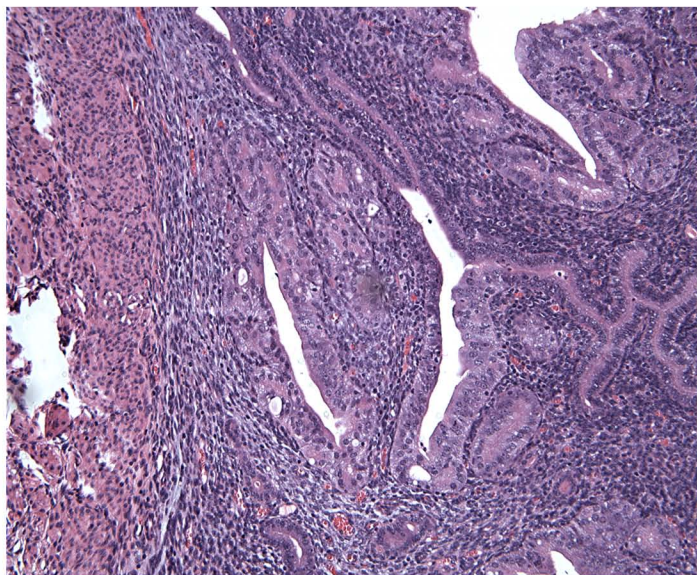

C57BL6/129SvJ F1

B

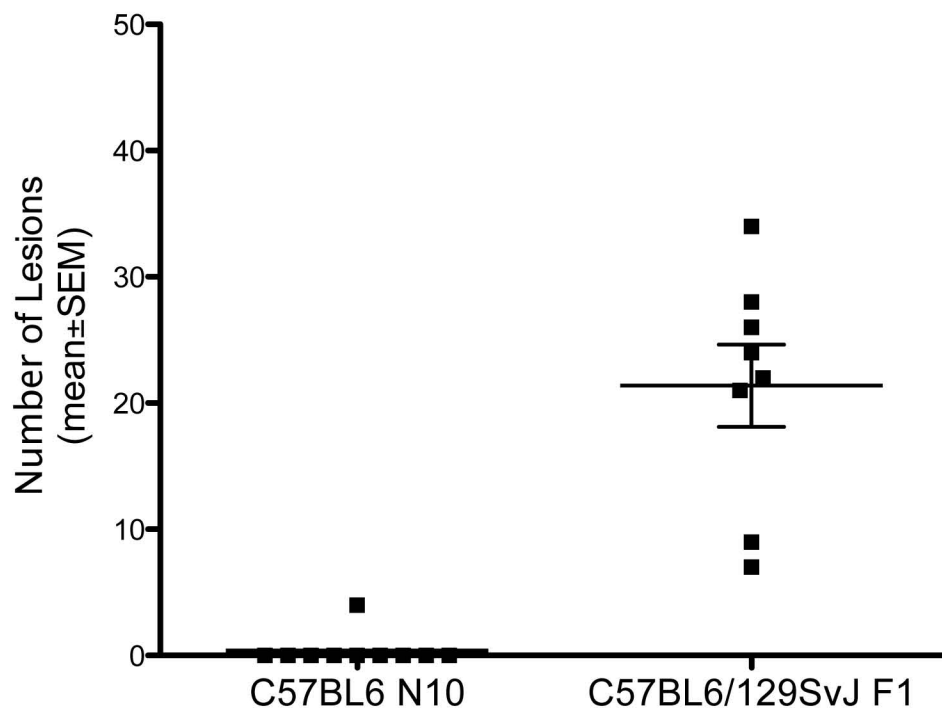

Supplement: mmc2.pdf [file mmc2.pdf]

# Figure S3

A

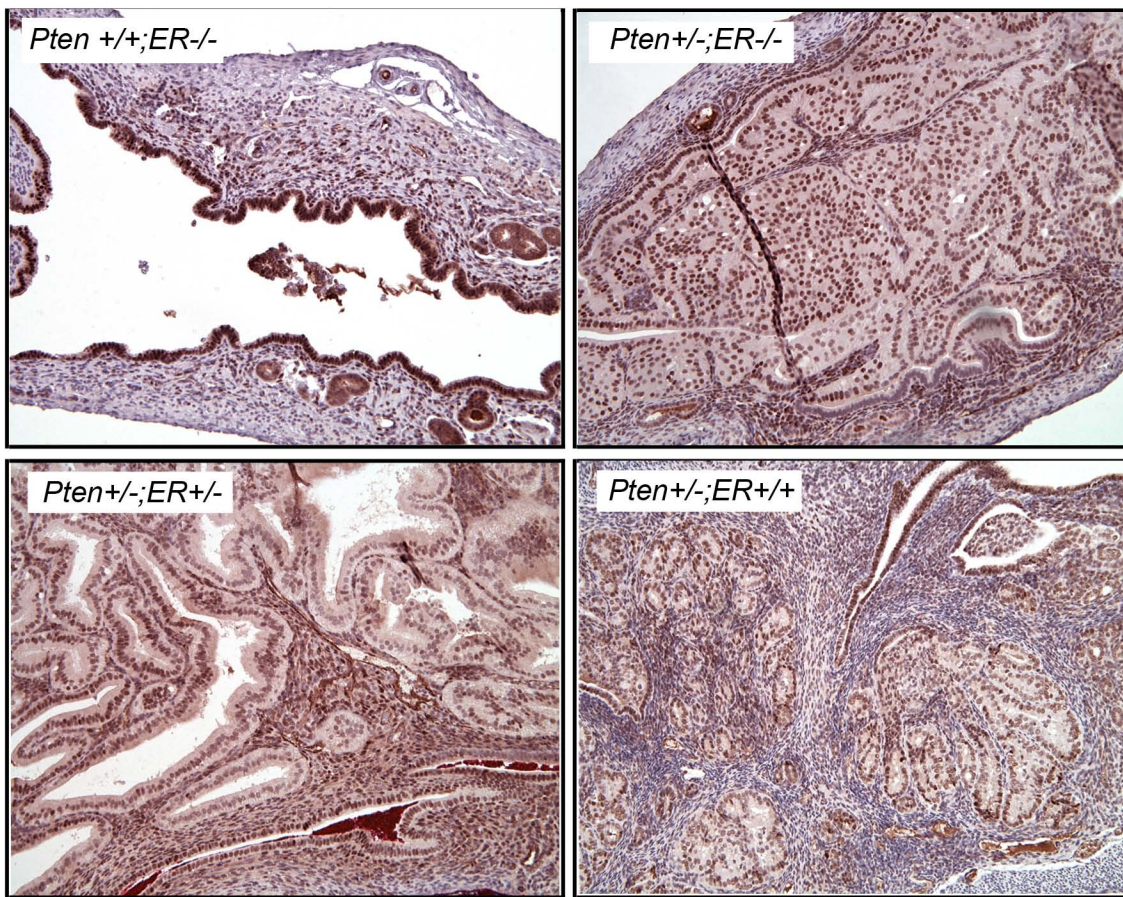

B

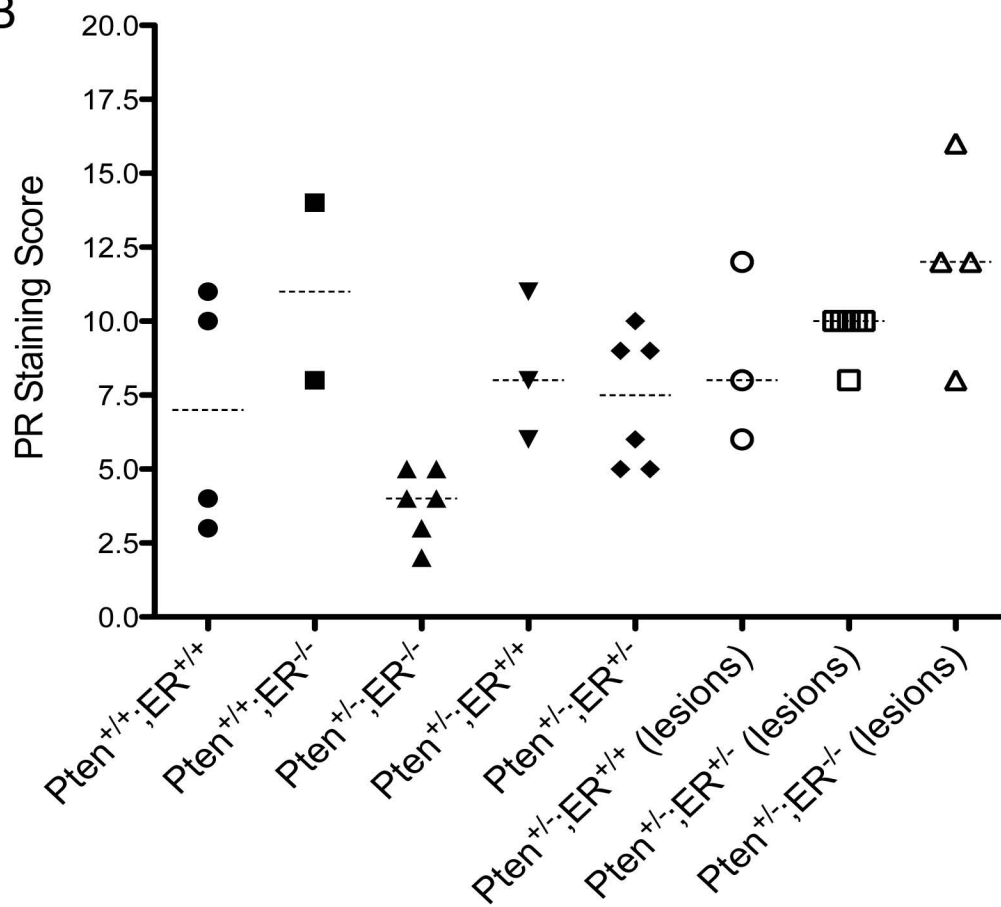

Supplement: mmc3.pdf [file mmc3.pdf]
